# Supplementary material for: Genomic Characterization and Clinical Outcomes of Patients with Peritoneal Metastases from the AACR GENIE Biopharma Collaborative Colorectal Cancer Registry
Source: Oxford University Press journal article supplement (doi:10.1158/2767-9764.crc-23-0409), 2024-02-08
Supplement: crc-23-0409-s04.pdf [file crc-23-0409-s04.pdf]

| Center | Type of Panel                                                                                                        | Genes                                                                            | Depth of coverage          | Alteration types                                                           | Coverage                                          | Cellularity  |
|--------|----------------------------------------------------------------------------------------------------------------------|----------------------------------------------------------------------------------|----------------------------|----------------------------------------------------------------------------|---------------------------------------------------|--------------|
| DFCI   | Custom, hybridization-based capture panel (Oncopanel)                                                                | V2 326 genes<br>V3 exonic regions of 447 genes, 191 intronic regions of 60 genes | 350x                       | SNV<br>Small indels<br>CNA (gene level)<br>SVA                             | Coding exons and Introns                          | At least 20% |
| MSKCC  | Custom, hybridization-based capture panel (MSK-IMPACT)                                                               | V1 341 genes<br>V2 410 genes<br>V3 468 genes                                     | 750X                       | SNV<br>Small indels<br>CNA (gene and intragenic level)<br>SVA              | Coding exons, introns and promoter                | At least 10% |
| VICC   | Illumina hybridization-based capture panel (Foundation Medicine)<br><br>Hotspot Amplicon panels (VICC-01-solidtumor) | T5a Panel 326 genes<br><br>T7 Panel 434 genes<br><br>34 genes                    | 750-1000X<br><br><br>1000X | SNV<br>Small indels<br>CNA (gene level)<br>SVA<br><br>SNV and small indels | Coding exons and introns<br><br><br>Only Hotspots | At least 20% |

**Supplementary Table 1. Main genomic analysis performed in GENIE project in the 3 participating centers included in the Colorectal Cancer Cohort.** DCFI: Dana Farber Cancer Center; MSK: Memorial Sloan Kettering Cancer Center; VICC: Vanderbilt-Ingram Cancer Center. SNV: Single Nucleotide Variants; CNA: Copy number alterations; SVA: Structural Variants

| Characteristic                                               | Stage I-III with Distant Metastasis<br>(N=581)       |                                                  | Stage IV (N = 700)                                   |                                                   |
|--------------------------------------------------------------|------------------------------------------------------|--------------------------------------------------|------------------------------------------------------|---------------------------------------------------|
|                                                              | No Peritoneal<br>Metastasis, N =<br>486 <sup>1</sup> | Peritoneal<br>Metastasis, N =<br>95 <sup>1</sup> | No Peritoneal<br>Metastasis, N =<br>551 <sup>1</sup> | Peritoneal<br>Metastasis, N =<br>149 <sup>1</sup> |
| <b>Age at diagnosis</b>                                      | 56 (48, 66)                                          | 52 (48, 64)                                      | 53 (45, 63)                                          | 53 (44, 63)                                       |
| <b>Sex</b>                                                   |                                                      |                                                  |                                                      |                                                   |
| Female                                                       | 193 (40%)                                            | 55 (58%)                                         | 239 (43%)                                            | 84 (56%)                                          |
| Male                                                         | 293 (60%)                                            | 40 (42%)                                         | 312 (57%)                                            | 65 (44%)                                          |
| <b>Race/ethnicity</b>                                        |                                                      |                                                  |                                                      |                                                   |
| Non-Hispanic<br>White                                        | 386 (79%)                                            | 73 (77%)                                         | 415 (75%)                                            | 108 (72%)                                         |
| Non-Hispanic<br>Black                                        | 33 (6.8%)                                            | 8 (8.4%)                                         | 42 (7.6%)                                            | 8 (5.4%)                                          |
| AAAPI<br>(Asian, Asian<br>American, and<br>Pacific Islander) | 22 (4.5%)                                            | 7 (7.4%)                                         | 33 (6.0%)                                            | 9 (6.0%)                                          |
| Unknown<br>race                                              | 23 (4.7%)                                            | 2 (2.1%)                                         | 24 (4.4%)                                            | 10 (6.7%)                                         |
| Hispanic/Lati<br>nx                                          | 15 (3.1%)                                            | 4 (4.2%)                                         | 25 (4.5%)                                            | 6 (4.0%)                                          |
| Other                                                        | 7 (1.4%)                                             | 1 (1.1%)                                         | 12 (2.2%)                                            | 8 (5.4%)                                          |
| <b>Primary tumor</b>                                         |                                                      |                                                  |                                                      |                                                   |
| <b>Location of primary tumor</b>                             |                                                      |                                                  |                                                      |                                                   |
| Left colon                                                   | 124 (27%)                                            | 30 (33%)                                         | 185 (35%)                                            | 49 (36%)                                          |
| Rectal                                                       | 205 (44%)                                            | 21 (23%)                                         | 184 (35%)                                            | 21 (16%)                                          |
| Right colon                                                  | 137 (29%)                                            | 41 (45%)                                         | 155 (30%)                                            | 65 (48%)                                          |
| Unknown                                                      | 20                                                   | 3                                                | 27                                                   | 14                                                |
| <b>Side of primary tumor</b>                                 |                                                      |                                                  |                                                      |                                                   |
| Left                                                         | 329 (71%)                                            | 51 (55%)                                         | 369 (70%)                                            | 70 (52%)                                          |
| Right                                                        | 137 (29%)                                            | 41 (45%)                                         | 155 (30%)                                            | 65 (48%)                                          |
| Unknown                                                      | 20                                                   | 3                                                | 27                                                   | 14                                                |
| <b>Histological grade</b>                                    |                                                      |                                                  |                                                      |                                                   |
| I/II                                                         | 319 (75%)                                            | 53 (64%)                                         | 371 (79%)                                            | 69 (58%)                                          |
| III/IV                                                       | 106 (25%)                                            | 30 (36%)                                         | 100 (21%)                                            | 49 (42%)                                          |
| Unknown                                                      | 61                                                   | 12                                               | 80                                                   | 31                                                |
| <b>Histology</b>                                             |                                                      |                                                  |                                                      |                                                   |
| Adenocarcin<br>oma                                           | 378 (91%)                                            | 63 (76%)                                         | 453 (96%)                                            | 102 (81%)                                         |
| Mucinous<br>adenocarcinoma                                   | 24 (5.8%)                                            | 16 (19%)                                         | 10 (2.1%)                                            | 17 (13%)                                          |
| Other<br>histologies/mixed<br>tumor                          | 8 (1.9%)                                             | 0 (0%)                                           | 8 (1.7%)                                             | 2 (1.6%)                                          |

|                                                                                                                                                  |           |          |           |           |
|--------------------------------------------------------------------------------------------------------------------------------------------------|-----------|----------|-----------|-----------|
| <b>Signet ring cell carcinoma</b>                                                                                                                | 4 (1.0%)  | 4 (4.8%) | 3 (0.6%)  | 5 (4.0%)  |
| <b>Unknown</b>                                                                                                                                   | 72        | 12       | 77        | 23        |
| <b>MSI status</b>                                                                                                                                |           |          |           |           |
| <b>MSI-H</b>                                                                                                                                     | 11 (2%)   | 2 (2%)   | 4 (3.9%)  | 3 (7.1%)  |
| <b>MSI-L/MSS</b>                                                                                                                                 | 105 (22%) | 16 (17%) | 98 (96%)  | 39 (93%)  |
| <b>MSI non-concordant</b>                                                                                                                        | 0 (0%)    | 1 (1%)   | 0 (0%)    | 0 (0%)    |
| <b>Unknown MSI status</b>                                                                                                                        | 370 (76%) | 76 (80%) | 449       | 107       |
| <b>MMR status</b>                                                                                                                                |           |          |           |           |
| <b>dMMR</b>                                                                                                                                      | 39 (8%)   | 5 (6.3%) | 8 (2.0%)  | 10 (9.0%) |
| <b>Indeterminate</b>                                                                                                                             | 5 (1%)    | 0 (0%)   | 1 (0.2%)  | 2 (1.8%)  |
| <b>pMMR</b>                                                                                                                                      | 316 (65%) | 72 (90%) | 388       | 99        |
| <b>MMR non-concordant</b>                                                                                                                        | 6 (1%)    | 3 (3.8%) | 4 (1.0%)  | 0 (0%)    |
| <b>Unknown MMR status</b>                                                                                                                        | 120 (25%) | 15       | 150       | 38        |
| <b>NGS report after death/last follow-up</b>                                                                                                     | 27 (5.6%) | 5 (5.3%) | 36 (6.5%) | 9 (6.0%)  |
| <b>Sites of initial metastases (at the time of diagnosis with either stage IV disease or presentation with metastases following stage I-III)</b> |           |          |           |           |
| Liver metastases                                                                                                                                 | 170 (36%) | 9 (9.5%) | 490 (92%) | 54 (36%)  |
| Unknown                                                                                                                                          | 8         | 0        | 18        | 0         |
| Lung metastases                                                                                                                                  | 124 (26%) | 5 (5.3%) | 113 (21%) | 24 (16%)  |
| Unknown                                                                                                                                          | 8         | 0        | 18        | 0         |
| Brain metastases                                                                                                                                 | 2 (0.4%)  | 0 (0%)   | 6 (1.1%)  | 0 (0%)    |
| Unknown                                                                                                                                          | 8         | 0        | 18        | 0         |
| Bone metastases                                                                                                                                  | 10 (2.1%) | 0 (0%)   | 19 (3.6%) | 6 (4.0%)  |
| Unknown                                                                                                                                          | 8         | 0        | 18        | 0         |

<sup>1</sup>n (%); Median (IQR)

**Supplementary Table 2: Main clinical, pathological, and molecular characteristics of the population included in the study according to stage I-III or IV at diagnosis:** Association between those variables and presence of peritoneal metastases (PM) has been also analyzed (p-value). *dMMR*: *Deficient mismatch*

*repair system; IQR: interquartile range; pMMR: proficient mismatch repair system. Sd: Standard deviation; min: minimum; max: maximum.*

| Characteristic                     | Overall, N = 1,281 <sup>1</sup> | Stage I-III with Distant Metastasis, N = 581 <sup>1</sup> | Stage IV, N = 700 <sup>1</sup> |
|------------------------------------|---------------------------------|-----------------------------------------------------------|--------------------------------|
| <b>Sample type</b>                 |                                 |                                                           |                                |
| Local recurrence                   | 12 (0.9%)                       | 10 (1.7%)                                                 | 2 (0.3%)                       |
| Lymph node metastasis              | 2 (0.2%)                        | 2 (0.3%)                                                  | 0 (0%)                         |
| <b>Metastasis site unspecified</b> |                                 |                                                           |                                |
| Unknown                            | 6 (0.5%)                        | 4 (0.7%)                                                  | 2 (0.3%)                       |
| Primary tumor                      | 792 (62%)                       | 352 (61%)                                                 | 440 (63%)                      |
| <b>Sequencing Assay ID</b>         |                                 |                                                           |                                |
| DFCI-ONCOPANEL-2                   | 241 (19%)                       | 126 (22%)                                                 | 115 (16%)                      |
| DFCI-ONCOPANEL-3                   | 224 (17%)                       | 120 (21%)                                                 | 104 (15%)                      |
| MSK-IMPACT341                      | 7 (0.5%)                        | 2 (0.3%)                                                  | 5 (0.7%)                       |
| MSK-IMPACT410                      | 290 (23%)                       | 123 (21%)                                                 | 167 (24%)                      |
| MSK-IMPACT468                      | 300 (23%)                       | 124 (21%)                                                 | 176 (25%)                      |
| VICC-01-SOLIDTUMOR                 | 52 (4.1%)                       | 20 (3.4%)                                                 | 32 (4.6%)                      |
| VICC-01-T5A                        | 1 (<0.1%)                       | 0 (0%)                                                    | 1 (0.1%)                       |
| VICC-01-T7                         | 166 (13%)                       | 66 (11%)                                                  | 100 (14%)                      |

<sup>1</sup>n (%)

**Supplementary Table 3: Samples analyzed for next generation sequencing (NGS), origin of the sample and panel NGS used.**

| <b>Characteristic</b>                                                                                                                            | <b>Overall, N = 1,204<sup>1</sup></b> | <b>No Peritoneal Metastasis, N = 974<sup>1</sup></b> | <b>Peritoneal Metastasis, N = 230<sup>1</sup></b> |
|--------------------------------------------------------------------------------------------------------------------------------------------------|---------------------------------------|------------------------------------------------------|---------------------------------------------------|
| <b>Metastatic cohort</b>                                                                                                                         |                                       |                                                      |                                                   |
| Stage I-III with Distant Metastasis                                                                                                              | 549 (46%)                             | 459 (47%)                                            | 90 (39%)                                          |
| Stage IV                                                                                                                                         | 655 (54%)                             | 515 (53%)                                            | 140 (61%)                                         |
| Age at diagnosis                                                                                                                                 | 54 (46, 64)                           | 54 (47, 64)                                          | 52 (45, 63)                                       |
| <b>Sex</b>                                                                                                                                       |                                       |                                                      |                                                   |
| Female                                                                                                                                           | 538 (45%)                             | 407 (42%)                                            | 131 (57%)                                         |
| Male                                                                                                                                             | 666 (55%)                             | 567 (58%)                                            | 99 (43%)                                          |
| <b>Race/ethnicity</b>                                                                                                                            |                                       |                                                      |                                                   |
| Non-Hispanic White                                                                                                                               | 972 (77%)                             | 757 (78%)                                            | 172 (75%)                                         |
| Non-Hispanic Black                                                                                                                               | 86 (7.1%)                             | 70 (7.2%)                                            | 16 (7.0%)                                         |
| AAAPI (Asian, Asian American, and Pacific Islander)                                                                                              | 67 (5.6%)                             | 51 (5.2%)                                            | 16 (7.0%)                                         |
| Unknown race                                                                                                                                     | 50 (4.2%)                             | 42 (4.3%)                                            | 8 (3.5%)                                          |
| Hispanic/Latinx                                                                                                                                  | 47 (3.9%)                             | 37 (3.8%)                                            | 10 (4.3%)                                         |
| Other                                                                                                                                            | 25 (2.1%)                             | 17 (1.7%)                                            | 8 (3.5%)                                          |
| <b>Primary tumor</b>                                                                                                                             |                                       |                                                      |                                                   |
| <b>Location of primary tumor</b>                                                                                                                 |                                       |                                                      |                                                   |
| Left colon                                                                                                                                       | 368 (32%)                             | 294 (32%)                                            | 74 (34%)                                          |
| Rectal                                                                                                                                           | 407 (36%)                             | 366 (39%)                                            | 41 (19%)                                          |
| Right colon                                                                                                                                      | 369 (32%)                             | 269 (29%)                                            | 100 (47%)                                         |
| Unknown                                                                                                                                          | 60                                    | 45                                                   | 15                                                |
| <b>Side of primary tumor</b>                                                                                                                     |                                       |                                                      |                                                   |
| Left                                                                                                                                             | 775 (68%)                             | 660 (71%)                                            | 115 (53%)                                         |
| Right                                                                                                                                            | 369 (32%)                             | 269 (29%)                                            | 100 (47%)                                         |
| Unknown                                                                                                                                          | 60                                    | 45                                                   | 15                                                |
| <b>Histological grade</b>                                                                                                                        |                                       |                                                      |                                                   |
| I/II                                                                                                                                             | 769 (74%)                             | 653 (77%)                                            | 116 (61%)                                         |
| III/IV                                                                                                                                           | 265 (26%)                             | 192 (23%)                                            | 73 (39%)                                          |
| Unknown                                                                                                                                          | 170                                   | 129                                                  | 41                                                |
| <b>Histology</b>                                                                                                                                 |                                       |                                                      |                                                   |
| Adenocarcinoma                                                                                                                                   | 966 (91%)                             | 803 (94%)                                            | 163 (80%)                                         |
| Mucinous adenocarcinoma                                                                                                                          | 64 (6.0%)                             | 33 (3.8%)                                            | 31 (15%)                                          |
| Other histologies/mixed tumor                                                                                                                    | 18 (1.7%)                             | 16 (1.9%)                                            | 2 (1.0%)                                          |
| Signet ring cell carcinoma                                                                                                                       | 15 (1.4%)                             | 6 (0.7%)                                             | 9 (4.4%)                                          |
| Unknown                                                                                                                                          | 141                                   | 116                                                  | 25                                                |
| <b>MSI status</b>                                                                                                                                |                                       |                                                      |                                                   |
| MSI-H                                                                                                                                            | 16 (6.2%)                             | 13 (6.4%)                                            | 3 (5.6%)                                          |
| MSI-L/MSS                                                                                                                                        | 240 (93%)                             | 190 (94%)                                            | 50 (93%)                                          |
| MSI non-concordant                                                                                                                               | 1 (<1%)                               | 0 (0%)                                               | 1 (2%)                                            |
| Unknown                                                                                                                                          | 947                                   | 771                                                  | 176                                               |
| <b>MMR status</b>                                                                                                                                |                                       |                                                      |                                                   |
| dMMR                                                                                                                                             | 58 (6.4%)                             | 45 (6.2%)                                            | 13 (7.1%)                                         |
| pMMR                                                                                                                                             | 824 (91%)                             | 660 (92%)                                            | 164 (90%)                                         |
| Indeterminate                                                                                                                                    | 8 (0.9%)                              | 6 (0.8%)                                             | 2 (1.1%)                                          |
| MMR non-concordant                                                                                                                               | 12 (1.3%)                             | 9 (1.3%)                                             | 3 (1.6%)                                          |
| Unknown                                                                                                                                          | 302                                   | 254                                                  | 48                                                |
| <b>NGS report after death/last follow-up</b>                                                                                                     |                                       |                                                      |                                                   |
|                                                                                                                                                  | 0 (0%)                                | 0 (0%)                                               | 0 (0%)                                            |
| <b>Sites of initial metastases (at the time of diagnosis with either stage IV disease or presentation with metastases following stage I-III)</b> |                                       |                                                      |                                                   |
| Liver metastases                                                                                                                                 | 684 (58%)                             | 624 (66%)                                            | 60 (26%)                                          |
| Unknown                                                                                                                                          | 25                                    | 25                                                   | 0                                                 |
| Lung metastases                                                                                                                                  | 249 (21%)                             | 220 (23%)                                            | 29 (13%)                                          |
| Unknown                                                                                                                                          | 25                                    | 25                                                   | 0                                                 |
| Brain metastases                                                                                                                                 | 8 (0.7%)                              | 8 (0.8%)                                             | 0 (0%)                                            |
| Unknown                                                                                                                                          | 25                                    | 25                                                   | 0                                                 |
| Bone metastases                                                                                                                                  | 31 (2.6%)                             | 25 (2.6%)                                            | 6 (2.6%)                                          |
| Unknown                                                                                                                                          | 25                                    | 25                                                   | 0                                                 |

<sup>1</sup>n (%); Median (IQR)

**Supplementary Table 4: Main clinical, pathological, and molecular characteristics of the population included in the OS cohort:** Association between those variables and presence of PM has been also analyzed (p-value).  
*dMMR: Deficient mismatch repair system; pMMR: proficient mismatch repair system.*

| Characteristic                           | N   | N event | Median overall survival (months) | p-value <sup>1</sup> |
|------------------------------------------|-----|---------|----------------------------------|----------------------|
|                                          |     |         |                                  | <0.001               |
| <i>KRAS</i> status by presence of PM     |     |         |                                  |                      |
| <i>KRAS</i> mt; No PM                    | 423 | 246     | 27.24 (21.74, 33.32)             |                      |
| <i>KRAS</i> mt; PM                       | 116 | 72      | 23.72 (17.60, 31.71)             |                      |
| <i>KRAS</i> wt; No PM                    | 550 | 273     | 40.53 (34.21, 45.33)             |                      |
| <i>KRAS</i> wt; PM                       | 114 | 65      | 28.09 (24.47, 38.49)             |                      |
|                                          |     |         |                                  | 0.035                |
| <i>BRAF</i> status by presence of PM     |     |         |                                  |                      |
| <i>BRAF</i> mt; No PM                    | 92  | 51      | 20.92 (16.58, 32.17)             |                      |
| <i>BRAF</i> mt; PM                       | 26  | 17      | 21.97 (12.93, 49.97)             |                      |
| <i>BRAF</i> wt; No PM                    | 881 | 468     | 34.21 (31.32, 39.01)             |                      |
| <i>BRAF</i> wt; PM                       | 204 | 120     | 26.78 (22.66, 31.81)             |                      |
|                                          |     |         |                                  | 0.035                |
| <i>NRAS</i> status by presence of PM     |     |         |                                  |                      |
| <i>NRAS</i> mt; No PM                    | 51  | 29      | 30.39 (25.99, 48.42)             |                      |
| <i>NRAS</i> mt; PM                       | 8   | 5       | 28.09 (14.44, —)                 |                      |
| <i>NRAS</i> wt; No PM                    | 922 | 490     | 33.29 (30.43, 37.96)             |                      |
| <i>NRAS</i> wt; PM                       | 222 | 132     | 26.78 (22.01, 31.28)             |                      |
|                                          |     |         |                                  | <0.001               |
| <i>RAS/BRAF</i> status by presence of PM |     |         |                                  |                      |
| <i>RAS/BRAF</i> mt; No PM                | 547 | 319     | 26.71 (23.26, 31.51)             |                      |
| <i>RAS/BRAF</i> mt; PM                   | 146 | 91      | 23.13 (18.75, 30.30)             |                      |
| <i>RAS/BRAF</i> wt; No PM                | 426 | 200     | 45.03 (40.23, 54.28)             |                      |
| <i>RAS/BRAF</i> wt; PM                   | 84  | 46      | 29.14 (26.58, 42.43)             |                      |
|                                          |     |         |                                  | 0.013                |
| <i>PIK3CA</i> status by presence of PM   |     |         |                                  |                      |
| <i>PIK3CA</i> mt; No PM                  | 203 | 96      | 36.32 (28.49, 49.64)             |                      |
| <i>PIK3CA</i> mt; PM                     | 48  | 27      | 29.41 (24.84, 43.98)             |                      |
| <i>PIK3CA</i> wt; No PM                  | 770 | 423     | 32.34 (29.74, 37.73)             |                      |
| <i>PIK3CA</i> wt; PM                     | 182 | 110     | 24.80 (19.57, 31.12)             |                      |
|                                          |     |         |                                  | 0.001                |
| <i>APC</i> status by presence of PM      |     |         |                                  |                      |
| <i>APC</i> mt; No PM                     | 740 | 378     | 36.35 (31.61, 40.69)             |                      |
| <i>APC</i> mt; PM                        | 141 | 81      | 29.41 (24.47, 37.37)             |                      |
| <i>APC</i> wt; No PM                     | 190 | 113     | 25.72 (20.59, 33.32)             |                      |
| <i>APC</i> wt; PM                        | 82  | 51      | 23.72 (17.60, 31.12)             |                      |



|                                      |     |     |                      |
|--------------------------------------|-----|-----|----------------------|
| Unknown                              | 50  | 33  |                      |
|                                      |     |     | 0.025                |
| <i>TP53</i> status by presence of PM |     |     |                      |
| <i>TP53</i> mt; No PM                | 719 | 378 | 34.38 (31.45, 39.24) |
| <i>TP53</i> mt; PM                   | 156 | 94  | 24.47 (19.77, 31.12) |
| <i>TP53</i> wt; No PM                | 254 | 141 | 29.74 (23.26, 38.98) |
| <i>TP53</i> wt; PM                   | 74  | 43  | 29.41 (24.54, 40.56) |

<sup>1</sup>Log-rank p-value

**Supplementary Table 5: Overall survival according to *KRAS*, *NRAS* and *BRAF* status and the presence of peritoneal metastases.** *PM*: Peritoneal metastases; *non-PM*: No Peritoneal metastases. Note: estimations of genomic alterations presented are not annotated according to OncoKB.

| <b>Drug Regimen</b>     | <b>N = 473<sup>1</sup></b> |
|-------------------------|----------------------------|
| FOLFOX                  | 218 (46.3%)                |
| FOLFOX + Bevacizumab    | 94 (19.9%)                 |
| FOLFIRI + Bevacizumab   | 78 (16.5%)                 |
| FOLFIRI                 | 46 (9.7%)                  |
| FOLFOXIRI               | 11 (2.3%)                  |
| XELOX                   | 8 (1.7%)                   |
| FOLFOXIRI + Bevacizumab | 6 (1.3%)                   |
| XELOX + Bevacizumab     | 5 (1%)                     |
| FOLFIRI + Panitumumab   | 3 (0.6%)                   |
| FOLFOX + Panitumumab    | 3 (0.6%)                   |
| FOLFIRI + Cetuximab     | 1 (0.2%)                   |

<sup>1</sup>n (%)

**Supplementary Table 6: Systemic therapy offered in first line therapy in combination for mCRC in the GENIE BPC cohort.** FOLFOX: 5-fluouracile + leucovorin + oxaliplatin; FOLFIRI: 5-fluouracile + leucovorin + oxaliplatin; FOLFOXIRI: 5-fluouracile + leucovorin + oxaliplatin + irinotecan; XELOX: Capecitabine + Oxaliplatin.

| <b>Characteristic</b>                                | <b>N</b> | <b>N event</b> | <b>Median PFS (months)</b> |
|------------------------------------------------------|----------|----------------|----------------------------|
| <b>PM vs. no PM</b>                                  |          |                |                            |
| PFS-I                                                |          |                |                            |
| No PM                                                | 344      | 171            | 9.572 (8.191, 11.45)       |
| PM                                                   | 93       | 49             | 8.882 (7.829, 13.62)       |
| PFS-M                                                |          |                |                            |
| No PM                                                | 365      | 138            | 13.32 (11.38, 16.58)       |
| PM                                                   | 100      | 41             | 11.68 (8.289, 18.91)       |
| PFS-I-or-M                                           |          |                |                            |
| No PM                                                | 337      | 180            | 8.454 (7.368, 9.901)       |
| PM                                                   | 92       | 53             | 7.928 (5.526, 10.23)       |
| <b>PM only vs. PM and other metastasis vs. no PM</b> |          |                |                            |
| PFS-I                                                |          |                |                            |
| No PM                                                | 372      | 129            | 9.572 (8.191, 11.45)       |
| PM and others                                        | 47       | 17             | 7.829 (2.829, 9.309)       |
| PM only                                              | 54       | 20             | 10.53 (8.421, 31.41)       |
| PFS-M                                                |          |                |                            |
| No PM                                                | 344      | 171            | 13.32 (11.38, 16.58)       |
| PM and others                                        | 45       | 26             | 6.678 (1.053, —)           |
| PM only                                              | 48       | 23             | 13.82 (10.59, 34.24)       |
| PFS-I-or-M                                           |          |                |                            |
| No PM                                                | 377      | 180            | 8.454 (7.368, 9.901)       |
| PM and others                                        | 44       | 28             | 5.362 (1.612, 8.717)       |
| PM only                                              | 48       | 25             | 10.23 (7.434, 16.35)       |

**Supplementary Table 7: PFS based on different approaches in patients with peritoneal metastases (PM) or without PM (non-PM).** *PFS-I: Progression Free Survival based on imaging. PFS-M: Progression Free Survival based on Medical Reports; PFS-I-or-M: Progression Free Survival based on the earlier of PFS-I and PFS-M, whichever occurred first.*

| Characteristic                           | N   | N event | Median PFS (months)  | p-value <sup>1</sup> |
|------------------------------------------|-----|---------|----------------------|----------------------|
| <i>KRAS</i> status by presence of PM     |     |         |                      | 0.281                |
| <i>KRAS</i> mt; No PM                    | 169 | 63      | 13.26 (10.46, 20.03) |                      |
| <i>KRAS</i> mt; PM                       | 55  | 18      | 13.82 (8.914, —)     |                      |
| <i>KRAS</i> wt; No PM                    | 203 | 66      | 15.30 (13.62, 22.43) |                      |
| <i>KRAS</i> wt; PM                       | 46  | 19      | 18.91 (9.507, —)     |                      |
| <i>BRAF</i> status by presence of PM     |     |         |                      | 0.440                |
| <i>BRAF</i> mt; No PM                    | 31  | 10      | 22.57 (10.16, —)     |                      |
| <i>BRAF</i> mt; PM                       | 11  | 8       | 7.993 (4.408, —)     |                      |
| <i>BRAF</i> wt; No PM                    | 341 | 119     | 14.90 (13.26, 17.43) |                      |
| <i>BRAF</i> wt; PM                       | 90  | 29      | 13.88 (11.38, 34.24) |                      |
| <i>RAS/BRAF</i> status by presence of PM |     |         |                      | 0.152                |
| <i>RAS/BRAF</i> mt; No PM                | 217 | 78      | 13.98 (11.51, 20.03) |                      |
| <i>RAS/BRAF</i> mt; PM                   | 67  | 25      | 10.59 (8.289, 23.13) |                      |
| <i>RAS/BRAF</i> wt; No PM                | 155 | 51      | 15.43 (13.62, 22.43) |                      |
| <i>RAS/BRAF</i> wt; PM                   | 34  | 12      | 18.91 (11.38, —)     |                      |
| <i>PIK3CA</i> status by presence of PM   |     |         |                      | 0.554                |
| <i>PIK3CA</i> mt; No PM                  | 82  | 27      | 14.47 (11.84, —)     |                      |
| <i>PIK3CA</i> mt; PM                     | 16  | 5       | — (9.507, —)         |                      |
| <i>PIK3CA</i> wt; No PM                  | 290 | 102     | 15.16 (13.22, 19.28) |                      |
| <i>PIK3CA</i> wt; PM                     | 85  | 32      | 13.82 (10.59, 26.51) |                      |
| <i>APC</i> status by presence of PM      |     |         |                      | 0.199                |
| <i>APC</i> mt; No PM                     | 287 | 99      | 15.30 (13.45, 20.72) |                      |
| <i>APC</i> mt; PM                        | 56  | 18      | 21.71 (9.507, —)     |                      |
| <i>APC</i> wt; No PM                     | 64  | 24      | 10.10 (9.539, 19.28) |                      |
| <i>APC</i> wt; PM                        | 43  | 18      | 11.68 (8.421, —)     |                      |
| Unknown                                  | 23  | 7       |                      |                      |
| <i>TP53</i> status by presence of PM     |     |         |                      | 0.588                |
| <i>TP53</i> mt; No PM                    | 276 | 96      | 14.24 (13.22, 17.43) |                      |
| <i>TP53</i> mt; PM                       | 69  | 26      | 13.88 (9.276, 31.58) |                      |
| <i>TP53</i> wt; No PM                    | 96  | 33      | 16.58 (11.84, —)     |                      |
| <i>TP53</i> wt; PM                       | 32  | 11      | 13.82 (11.38, —)     |                      |

<sup>1</sup>Log-rank p-value

**Supplementary Table 8: Progression-free survival according to *KRAS*, *NRAS*, *BRAF*, *PI3KCA*, *APC* and *TP53* status and the presence of Peritoneal Metastases. PM: Peritoneal metastases; non-PM: No Peritoneal metastases; NA: Not available**

| <b>Univariable Cox Proportional Hazards Models</b>                                                                                    |          |                |                       |                           |                |
|---------------------------------------------------------------------------------------------------------------------------------------|----------|----------------|-----------------------|---------------------------|----------------|
| <b>Characteristic</b>                                                                                                                 | <b>N</b> | <b>Event N</b> | <b>HR<sup>1</sup></b> | <b>95% CI<sup>1</sup></b> | <b>p-value</b> |
| Presence of peritoneal metastasis                                                                                                     |          |                |                       |                           | 0.5            |
| No peritoneal metastasis                                                                                                              | 372      | 129            | —                     | —                         |                |
| Peritoneal metastasis                                                                                                                 | 101      | 37             | 1.15                  | 0.80, 1.65                |                |
| Presence of peritoneal metastasis (peritoneal only vs. peritoneal and other sites of distant metastasis vs. no peritoneal metastasis) |          |                |                       |                           | 0.4            |
| No peritoneal metastasis                                                                                                              | 372      | 129            | —                     | —                         |                |
| Peritoneal metastasis and other sites of distant metastasis                                                                           | 47       | 17             | 1.41                  | 0.85, 2.34                |                |
| Peritoneal metastasis only                                                                                                            | 54       | 20             | 0.99                  | 0.62, 1.59                |                |
| Metastatic cohort                                                                                                                     |          |                |                       |                           | 0.3            |
| Stage I-III with Distant Metastases                                                                                                   | 173      | 69             | —                     | —                         |                |
| Stage IV                                                                                                                              | 300      | 97             | 1.18                  | 0.86, 1.61                |                |
| Location of primary tumor                                                                                                             |          |                |                       |                           | 0.7            |
| Left colon                                                                                                                            | 145      | 54             | —                     | —                         |                |
| Rectum                                                                                                                                | 149      | 45             | 0.83                  | 0.56, 1.24                |                |
| Right colon                                                                                                                           | 157      | 59             | 0.93                  | 0.64, 1.35                |                |
| Side of primary tumor                                                                                                                 |          |                |                       |                           | >0.9           |
| Left                                                                                                                                  | 294      | 99             | —                     | —                         |                |
| Right                                                                                                                                 | 157      | 59             | 1.02                  | 0.74, 1.40                |                |
| MSI status                                                                                                                            |          |                |                       |                           | >0.9           |
| MSI-L/MSS                                                                                                                             | 85       | 27             | —                     | —                         |                |
| MSI-H                                                                                                                                 | 5        | 2              | 0.96                  | 0.22, 4.18                |                |
| MMR status                                                                                                                            |          |                |                       |                           | 0.3            |
| pMMR                                                                                                                                  | 350      | 121            | —                     | —                         |                |
| dMMR                                                                                                                                  | 14       | 5              | 0.63                  | 0.26, 1.53                |                |
| Any <i>KRAS/BRAF/NRAS</i> alteration                                                                                                  | 284      | 103            | 1.32                  | 0.96, 1.80                | 0.087          |
| <i>APC</i> alteration                                                                                                                 | 343      | 117            | 0.69                  | 0.48, 0.98                | <b>0.040</b>   |
| <i>TP53</i> alteration                                                                                                                | 345      | 122            | 1.20                  | 0.85, 1.69                | 0.3            |
| <i>PIK3CA</i> alteration                                                                                                              | 98       | 32             | 0.87                  | 0.59, 1.28                | 0.5            |
| Liver metastases at advanced diagnosis                                                                                                | 282      | 98             | 1.37                  | 1.00, 1.88                | <b>0.049</b>   |
| Lung metastases at advanced diagnosis                                                                                                 | 112      | 37             | 1.24                  | 0.86, 1.80                | 0.2            |
| <b>Multivariable Cox Proportional Hazards Model</b>                                                                                   |          |                |                       |                           |                |
| <b>Characteristic</b>                                                                                                                 |          |                | <b>HR<sup>1</sup></b> | <b>95% CI<sup>1</sup></b> | <b>p-value</b> |
| Time (months) from advanced diagnosis to NGS report                                                                                   | 442      | 157            | 0.99                  | 0.94, 1.04                | 0.7            |
| <i>APC</i> alteration                                                                                                                 | 267      | 95             | 0.61                  | 0.42, 0.89                | <b>0.010</b>   |
| Liver metastases at advanced diagnosis                                                                                                | 338      | 117            | 1.70                  | 1.22, 2.38                | <b>0.002</b>   |

<sup>1</sup>HR = Hazard Ratio, CI = Confidence Interval

\*Note: 2 patients in the PFS study cohort with MMR non-concordant status were omitted from the univariable analysis.

**Supplementary Table 9. Univariable and Multivariable Cox proportional hazards models for progression-free survival.** *PM: Peritoneal metastasis; non-PM: No Peritoneal metastasis; dMMR: Deficient mismatch repair system; MSI-H: MSI-high; MSI-L/MSS: MSI-low/microsatellite stable; pMMR: proficient mismatch repair system.*
